# Supplementary material
Source: Royal Society of Chemistry journal article supplement (doi:10.1039/d6dt00510a)
Supplement: d6dt00510a1.pdf [file d6dt00510a1.pdf]

1

## Supplementary Material

2

### 3 **Dual-Emission Luminescent Eu-MOF/g-C<sub>3</sub>N<sub>4</sub> Nanomaterials: A** 4 **Novel Bifunctional Platform for Aflatoxin B<sub>1</sub> Detection and** 5 **Degradation**

6

7 Wenjing Yin<sup>a1</sup>, Ping Liu<sup>a1</sup>, Wenzhen Du<sup>b</sup>, Xuefang Lan<sup>b,\*</sup>, Qingli Yang<sup>a,\*</sup>, Yongchao  
8 Ma<sup>b,\*</sup>

9 *<sup>a</sup> College of Food Science and Engineering, Qingdao Agricultural University, Qingdao,*  
10 *266109, P. R. China*

11 *<sup>b</sup> College of Chemistry and Pharmaceutical Sciences, Qingdao Agricultural University,*  
12 *Qingdao, 266109, P. R. China*

13

14 **\*Corresponding authors: [yongchaoma@126.com](mailto:yongchaoma@126.com).**

15 <sup>1</sup> These authors contributed equally to this work.

16

## 17 **1. Materials and instruments**

### 18 1.1 Chemicals and reagents

19 Europium nitrate hexahydrate ( $\text{Eu}(\text{NO}_3)_3 \cdot 6\text{H}_2\text{O}$ , 99.9%), 4,4',4'',4'''-(pyrazine-2,3,5,6-  
20 tetrayl) tetrabenzoic acid ( $\text{H}_4\text{TCPP}$ , 98%), melamine ( $\text{C}_3\text{H}_6\text{N}_6$ , 98%), N,N-  
21 dimethylformamide (DMF, AR, 99.5%), anhydrous ethanol (AR, 99.5%), methanol  
22 (for HPLC,  $\geq 99.9\%$ ), and acetonitrile (for HPLC,  $\geq 99.9\%$ ), aflatoxin B1 (AFB1,  $\geq$   
23 98.0%), aflatoxin B2 (AFB2,  $\geq 98.0\%$ ), sodium chloride (NaCl), potassium chloride  
24 (KCl), calcium chloride ( $\text{CaCl}_2$ ), magnesium chloride hexahydrate ( $\text{MgCl}_2 \cdot 6\text{H}_2\text{O}$ ) and  
25 copper sulfate pentahydrate ( $\text{CuSO}_4 \cdot 5\text{H}_2\text{O}$ ), zinc chloride ( $\text{ZnCl}_2$ ), cobaltous chloride  
26 hexahydrate ( $\text{CoCl}_2 \cdot 6\text{H}_2\text{O}$ ), aluminum chloride hexahydrate ( $\text{AlCl}_3 \cdot 6\text{H}_2\text{O}$ ), ferric  
27 chloride hexahydrate ( $\text{FeCl}_3 \cdot 6\text{H}_2\text{O}$ ), manganese chloride tetrahydrate ( $\text{MnCl}_2 \cdot 4\text{H}_2\text{O}$ ),  
28 ochratoxin A (OTA), zearalenone (ZEN), ascorbic acid (AA), gallic acid (GA), Lysine  
29 (Lys), Cysteine (Cys), maltose (ML), glucose (GL) were purchased from Macklin  
30 Biochemical Co., Ltd. (Shanghai, China). P-benzoquinone (PBQ,  $\text{C}_6\text{H}_4\text{O}_2$ ), tert-Butano  
31 (BTA,  $\text{C}_4\text{H}_{10}\text{O}$ ), Ethylene Diamine Tetraacetic Acid (EDTA,  $\text{C}_{10}\text{H}_{16}\text{N}_2\text{O}_8$ ), were  
32 purchased from Sinopharm Chemical Reagent Co., Ltd. (Shanghai, China).

### 33 1.2 Instruments

34 The microscopic morphology of the synthesized materials was observed using a  
35 field emission scanning electron microscope (SEM, S-4800, Hitachi). The structures  
36 were analyzed by X-ray powder diffractometry (XRD, TD-3700, China) and Fourier  
37 transform infrared spectroscopy (FTIR, Nicolet iS10, USA). The light absorption  
38 characteristics were assessed using an ultraviolet-visible spectrometer equipped with  
39 an integrating sphere (UV-vis DRS, Shimadzu UV-3900, Japan). Photo-luminescence  
40 (PL) spectroscopy was conducted using a fluorescence spectrometer (PL, Shimadzu  
41 F7000, Japan). Time-resolved fluorescence spectroscopy (TRPL) was evaluated using  
42 the FLS1000 from Edinburgh Instruments, UK.

43

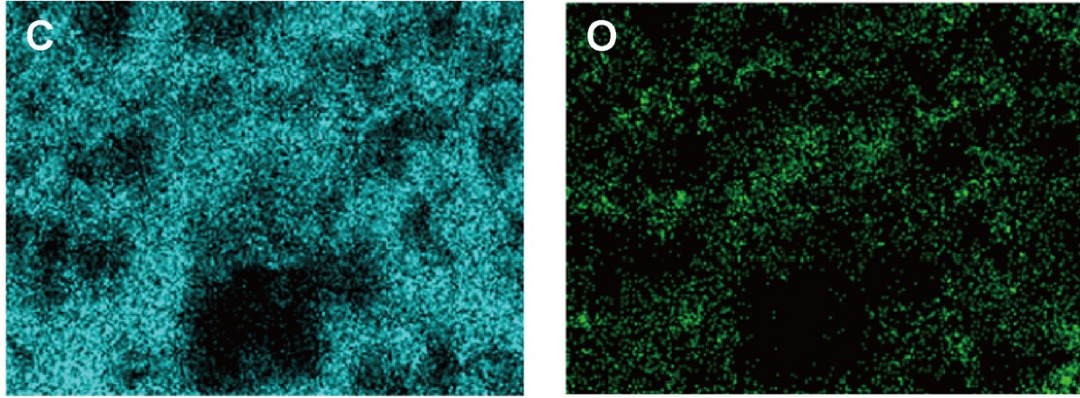

44

45 **Fig. S1.** C and N element mapping of Eu-MOF/g-C<sub>3</sub>N<sub>4</sub>.

46

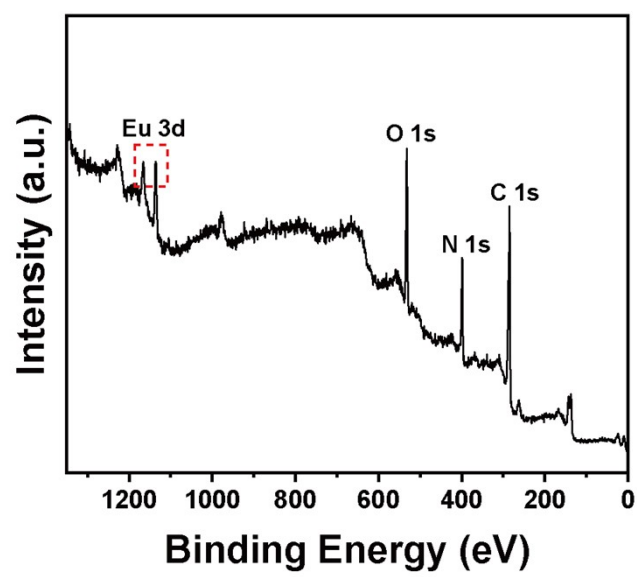

47

48 **Fig. S2.** XPS spectra of Eu-MOF/g-C<sub>3</sub>N<sub>4</sub>.

49

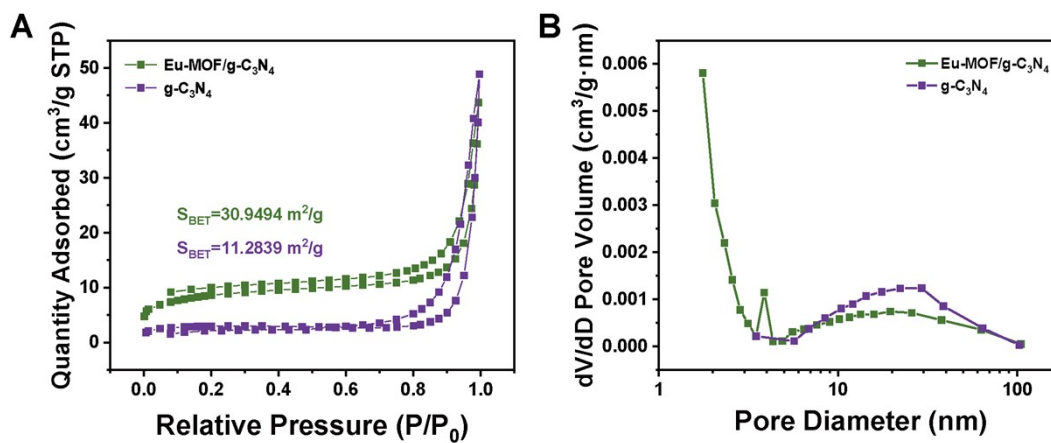

50

51 **Fig. S3.** (A)  $N_2$  adsorption-desorption isotherms of g- $C_3N_4$  and Eu-MOF. (B) Pore size  
 52 distribution curves of g- $C_3N_4$  and Eu-MOF.

53

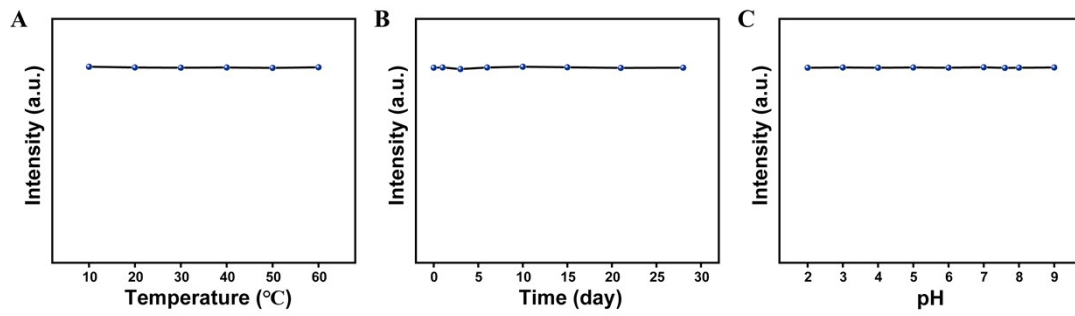

54

55 **Fig. S4.** Fluorescence stability of Eu-MOF/g-C<sub>3</sub>N<sub>4</sub> at different (A) temperatures, (B)  
56 storage durations, (C) pH values.

57

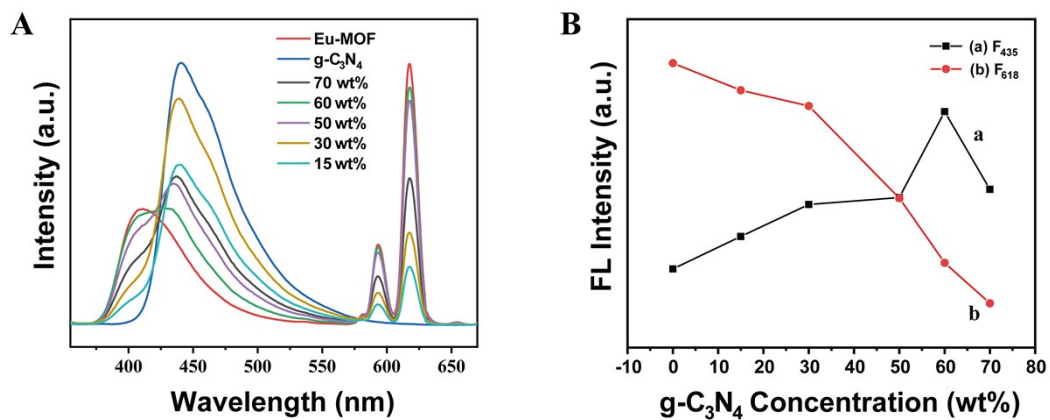

58

59 **Fig. S5.** (A) and (B) The amount of g-C<sub>3</sub>N<sub>4</sub> added to the fluorescence emission intensity

60 of Eu-MOF/g-C<sub>3</sub>N<sub>4</sub>.

61

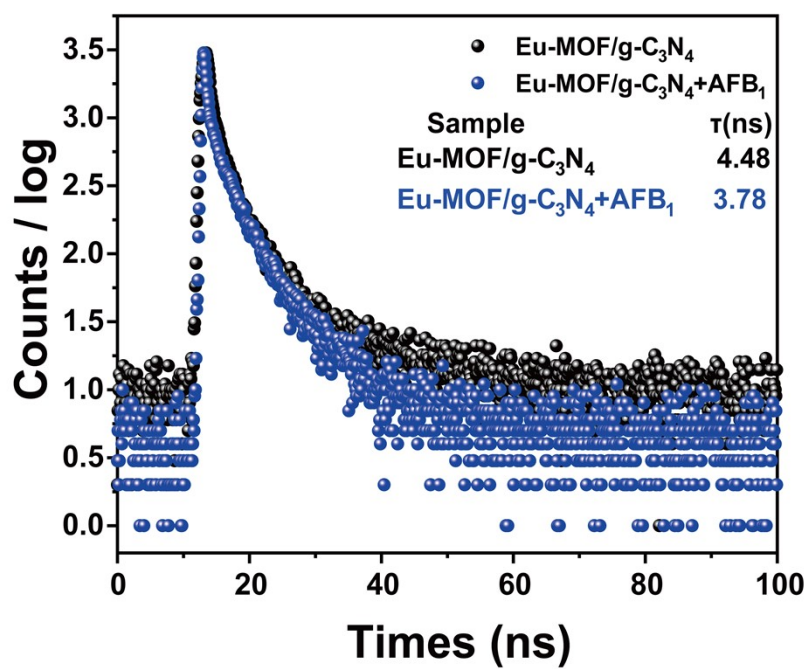

62

63 **Fig. S6.** FL lifetimes of Eu-MOF/g-C<sub>3</sub>N<sub>4</sub> with and without the presence of AFB<sub>1</sub>.

64

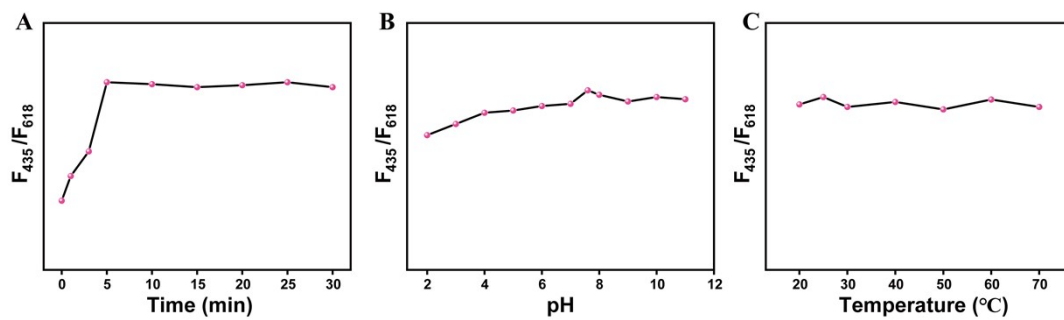

65

66 **Fig. S7.** Fluorescence response of Eu-MOF/g-C<sub>3</sub>N<sub>4</sub> to AFB<sub>1</sub> for different (A) reaction  
 67 times, (B) pH values, and (C) reaction temperatures of sensing system.

68

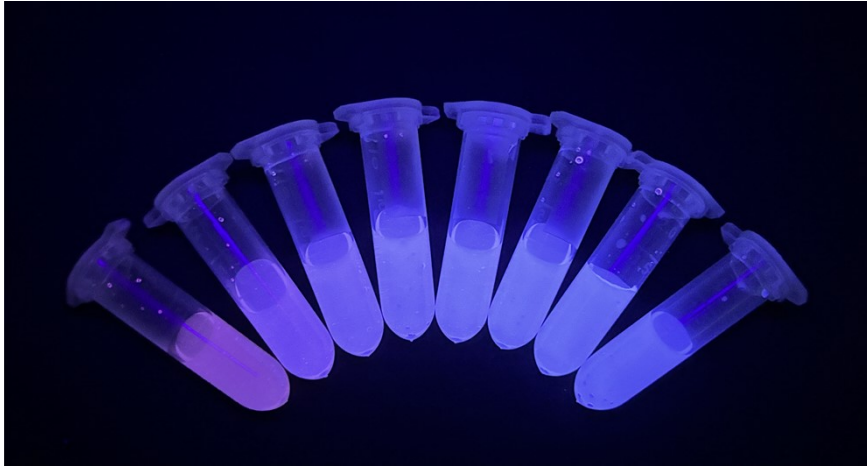

69

70 **Fig. S8.** Fluorescence for simultaneous detection and degradation.

71

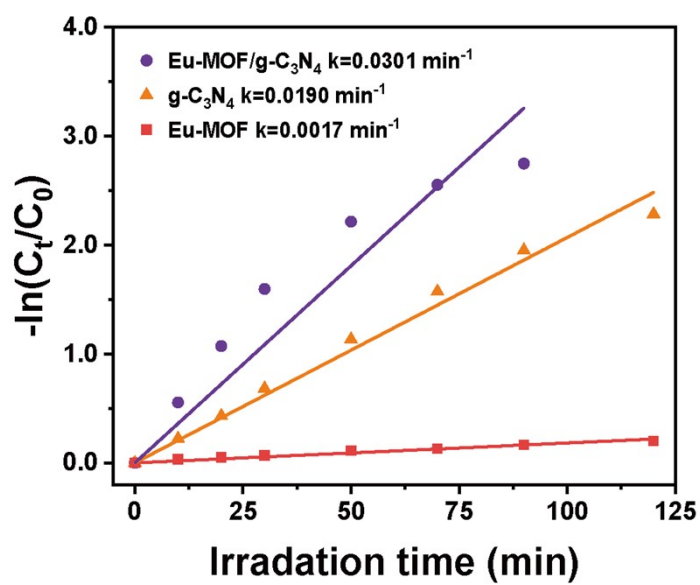

72

73 **Fig. S9.** Pseudo-first-order kinetic fitting curves of Eu-MOF/g-C<sub>3</sub>N<sub>4</sub>, g-C<sub>3</sub>N<sub>4</sub> and Eu-  
 74 MOF.

75

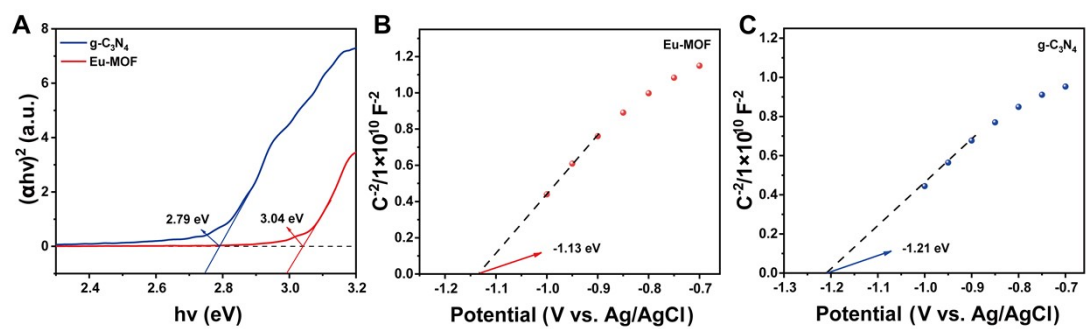

76

77 **Fig. S10.** (A) Band gap energies of Eu-MOF and  $g-C_3N_4$ . Mott-Schottky plots of Eu-  
 78 MOF(B), and  $g-C_3N_4$  (C).

79

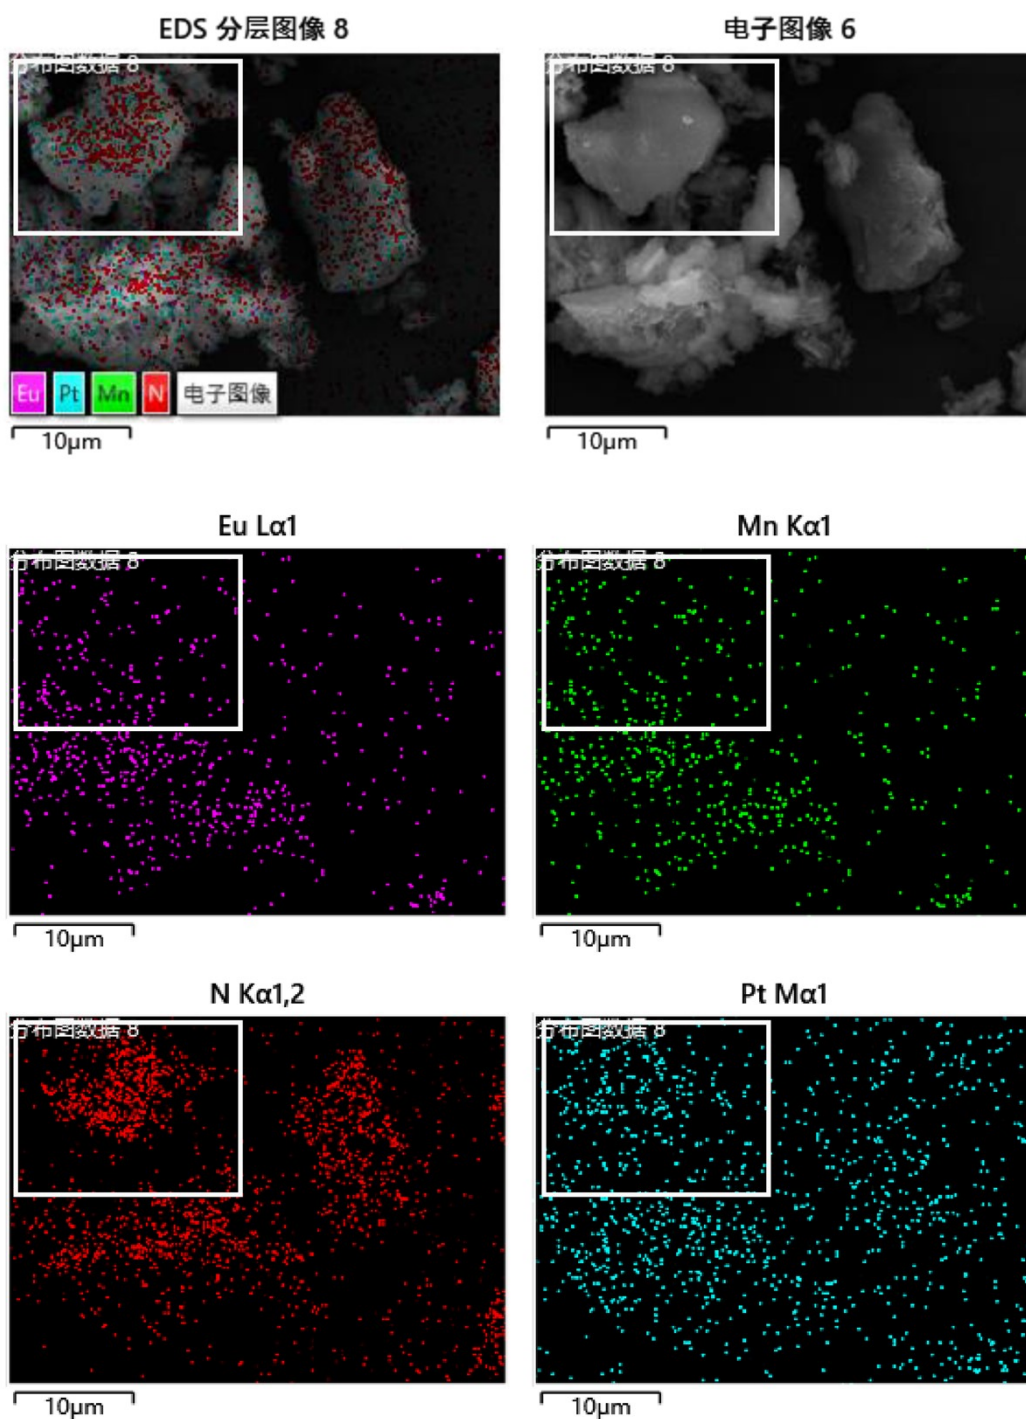

80

81 **Fig. S11.** SEM-EDS spectra of Eu-MOF/g-C<sub>3</sub>N<sub>4</sub> after photodeposition experiment.

82 **Note:** The selected areas in the figure show that Pt overlaps more with the N element  
 83 of carbon nitride, meaning that Pt is mainly deposited on carbon nitride, and electrons  
 84 accumulate on g-C<sub>3</sub>N<sub>4</sub>. Mn overlaps more with Eu, indicating that Mn is deposited on  
 85 Eu-MOF, which is a hole-rich site. According to the band data and the spatial  
 86 distribution results of photodeposited Pt and Mn, this is a Z-scheme heterojunction.

87

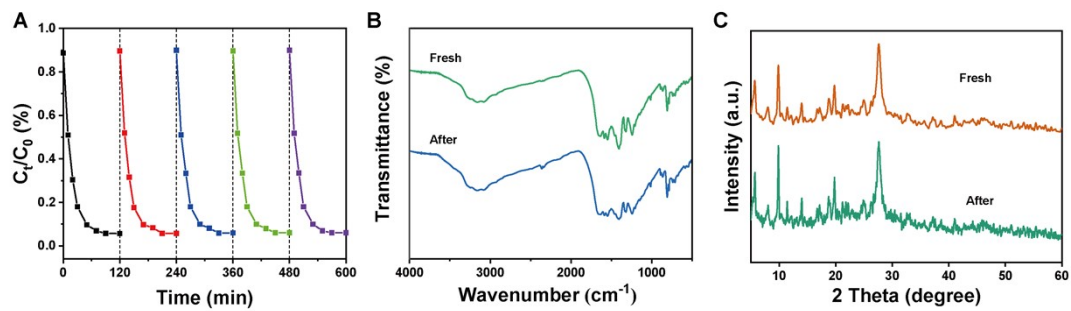

88

89 **Fig. S12.** (A) Degradation efficiency chart of Eu-MOF/g-C3N4 after five consecutive  
 90 test cycles. (B) FT-IR and (C) XRD spectra before and after cyclic degradation  
 91 experiments.

92

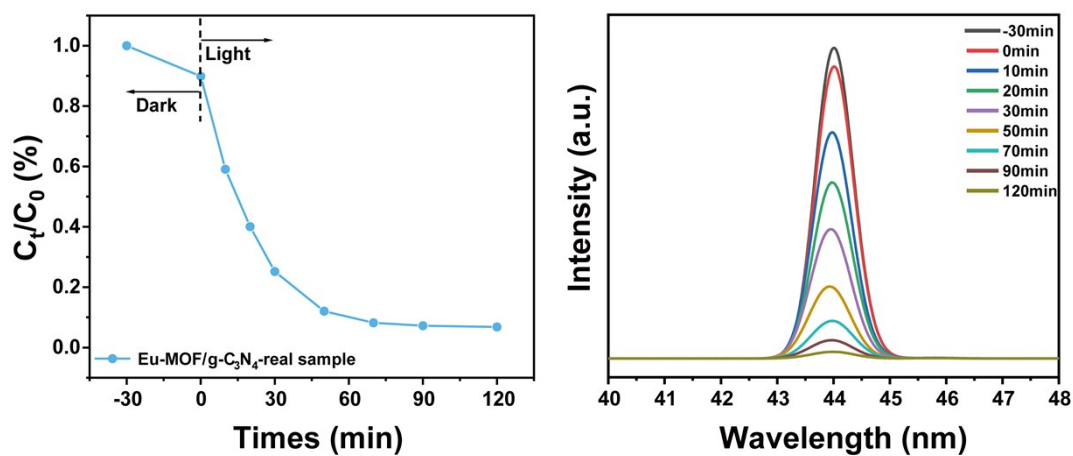

93

94 **Fig. S13.** (A) Photocatalytic degradation efficiency and (B) HPLC chromatograms of  
 95 AFB<sub>1</sub> degradation in peanut oil samples by Eu-MOF/g-C<sub>3</sub>N<sub>4</sub> under visible light  
 96 irradiation with different durations.

97

98 **Table S1.** Comparison Table of MOF based AFB<sub>1</sub> Detection and Degradation Systems.

| <b>Materials</b>                                                          | <b>Function</b>           | <b>Mechanism</b>                            | <b>LOD<br/>(ppb)</b> | <b>Degradation<br/>efficiency</b> | <b>Limitation</b>                                                 | <b>Ref</b>   |
|---------------------------------------------------------------------------|---------------------------|---------------------------------------------|----------------------|-----------------------------------|-------------------------------------------------------------------|--------------|
| Al-MOF                                                                    | Detection only            | Single emission                             | 11.67                | N/A                               | High detection limit; single transmission                         | 1            |
| LMOFs                                                                     | Detection only            | Single emission                             | 19.97                | N/A                               | Lower sensitivity                                                 | 2            |
| Zr-MOF                                                                    | Detection only            | Single emission                             | 0.5                  | N/A                               | Complex adapter modification;<br>Non visual detection             | 3            |
| GO/Cu <sub>3</sub> (BTC) <sub>2</sub> /<br>Fe <sub>3</sub> O <sub>4</sub> | Degradation<br>only       | Photocatalysis                              | N/A                  | 96.8%                             | Stability to be verified;<br>Degradation conditions not optimized | 4            |
| MAgPW                                                                     | Degradation<br>only       | Photocatalysis                              | N/A                  | 85%                               | Low degradation rate                                              | 5            |
| g-C <sub>3</sub> N <sub>4</sub> /<br>CQDs/MoS <sub>2</sub>                | Degradation<br>only       | adsorption-photocatalysis                   | N/A                  | 96.8%                             | Membrane preparation is complex;<br>MoS <sub>2</sub> may oxidize  | 6            |
| Cu-NH <sub>2</sub> -<br>BDC/Ag <sub>2</sub> S                             | Detection<br>+Degradation | Photoelectrochemical<br>+Photocatalysis     | 0.29                 | 98%                               | Extremely complex synthesis;<br>No visual detection;              | 7            |
| Eu-MOF/g-<br>C <sub>3</sub> N <sub>4</sub>                                | Detection<br>+Degradation | Ratiometric fluorescence<br>+Photocatalysis | 11.48                | 94.33%                            | This work                                                         | This<br>work |

99

100 **Table S2.** Detection of AFB<sub>1</sub> in real samples (n = 3).

| <b>Sample</b> | <b>Spiked (μM)</b> | <b>Found (μM)</b> | <b>Recovery (%)</b> | <b>RSD (% , n = 3)</b> |
|---------------|--------------------|-------------------|---------------------|------------------------|
|               | 0.1                | 0.0984            | 98.4                | 1.21                   |
|               | 0.5                | 0.487             | 97.4                | 1.32                   |
| Peanut oil    | 1.0                | 1.012             | 101.2               | 1.61                   |
|               | 2.5                | 2.489             | 99.56               | 0.95                   |
|               | 5.0                | 5.011             | 100.22              | 0.33                   |

101 The above results are the average of three repeated experiments.

102

## 103 **References**

- 104 1. F. X. Wang, Z. P. Li, H. P. Jia, R. H. Lu, S. B. Zhang, C. P. Pan and Z. Q. Zhang, *Food*  
105 *Chemistry*, 2022, **383**.
- 106 2. Z. S. Li, X. H. Xu, Y. C. Fu, Y. N. Guo, Q. Zhang, Q. Y. Zhang, H. Yang and Y. B. Li, *Rsc*  
107 *Adv*, 2019, **9**, 620-625.
- 108 3. X. B. Li, F. X. Meng, Z. D. Li, R. Z. Li, Y. K. Zhang and M. W. Zhang, *Sensor Actuat B-*  
109 *Chem*, 2023, **394**.
- 110 4. M. S. Samuel, K. Mohanraj, N. Chandrasekar, R. Balaji and E. Selvarajan, *Chemosphere*,  
111 2022, **291**.
- 112 5. P. Meng, J. Li, P. Wang, G. Yang, W. Liu, S. Liang, R. Yang and C. Sun, *Chem Eng J*, 2024,  
113 **483**.
- 114 6. R. X. Song, L. T. Yao, C. P. Sun, D. C. Yu, H. Lin, G. S. Li, Z. C. Lian, S. L. Zhuang and D.  
115 W. Zhang, *Toxins*, 2023, **15**.
- 116 7. X. Du, Z.-Y. Feng, B. Jin and L.-Y. Meng, *Surfaces and Interfaces*, 2025, **73**.  
117
